# Supplementary material for: Targeted long-read sequencing reveals clonally expanded HBV-associated chromosomal translocations in patients with chronic hepatitis B
Source: PubMed Central journal article supplement — JHEP Rep. 2022 Feb 12;4(4):100449. doi: 10.1016/j.jhepr.2022.100449 (PMC8918852; doi:10.1016/j.jhepr.2022.100449), 2022-02-12
Supplement: mmc3.pdf [file mmc3.pdf]

## ICMJE DISCLOSURE FORM

Date: August 16, 2021

Your Name: Henry LY Chan

Manuscript Title: Targeted Long-Read Sequencing Reveals Clonally Expanded HBV-Associated Chromosomal Translocations in CHB Patients

Manuscript number (if known): \_\_\_\_\_

In the interest of transparency, we ask you to disclose all relationships/activities/interests listed below that are related to the content of your manuscript. "Related" means any relation with for-profit or not-for-profit third parties whose interests may be affected by the content of the manuscript. Disclosure represents a commitment to transparency and does not necessarily indicate a bias. If you are in doubt about whether to list a relationship/activity/interest, it is preferable that you do so.

The following questions apply to the author's relationships/activities/interests as they relate to the current manuscript only.

The author's relationships/activities/interests should be defined broadly. For example, if your manuscript pertains to the epidemiology of hypertension, you should declare all relationships with manufacturers of antihypertensive medication, even if that medication is not mentioned in the manuscript.

In item #1 below, report all support for the work reported in this manuscript without time limit. For all other items, the time frame for disclosure is the past 36 months.

|                                                           |                                                                                                                                                                                | Name all entities with whom you have this relationship or indicate none (add rows as needed) | Specifications/Comments (e.g., if payments were made to you or to your institution) |
|-----------------------------------------------------------|--------------------------------------------------------------------------------------------------------------------------------------------------------------------------------|----------------------------------------------------------------------------------------------|-------------------------------------------------------------------------------------|
| <b>Time frame: Since the initial planning of the work</b> |                                                                                                                                                                                |                                                                                              |                                                                                     |
| 1                                                         | All support for the present manuscript (e.g., funding, provision of study materials, medical writing, article processing charges, etc.)<br><b>No time limit for this item.</b> | This study was funded by Gilead Sciences                                                     |                                                                                     |
|                                                           |                                                                                                                                                                                |                                                                                              |                                                                                     |
|                                                           |                                                                                                                                                                                |                                                                                              |                                                                                     |
|                                                           |                                                                                                                                                                                |                                                                                              |                                                                                     |
|                                                           |                                                                                                                                                                                |                                                                                              |                                                                                     |
|                                                           |                                                                                                                                                                                |                                                                                              |                                                                                     |
| <b>Time frame: past 36 months</b>                         |                                                                                                                                                                                |                                                                                              |                                                                                     |
| 2                                                         | Grants or contracts from any entity (if not indicated in item #1 above).                                                                                                       | ___ None                                                                                     |                                                                                     |
|                                                           |                                                                                                                                                                                |                                                                                              |                                                                                     |
|                                                           |                                                                                                                                                                                |                                                                                              |                                                                                     |
| 3                                                         | Royalties or licenses                                                                                                                                                          | ___ None                                                                                     |                                                                                     |
|                                                           |                                                                                                                                                                                |                                                                                              |                                                                                     |

|    |                                                                                                              |                   |                     |
|----|--------------------------------------------------------------------------------------------------------------|-------------------|---------------------|
|    |                                                                                                              |                   |                     |
| 4  | Consulting fees                                                                                              | Advisor of Gilead | Personal honorarium |
|    |                                                                                                              |                   |                     |
|    |                                                                                                              |                   |                     |
| 5  | Payment or honoraria for lectures, presentations, speakers bureaus, manuscript writing or educational events |                   |                     |
|    |                                                                                                              |                   |                     |
|    |                                                                                                              |                   |                     |
| 6  | Payment for expert testimony                                                                                 | ___ None          |                     |
|    |                                                                                                              |                   |                     |
|    |                                                                                                              |                   |                     |
| 7  | Support for attending meetings and/or travel                                                                 | ___ None          |                     |
|    |                                                                                                              |                   |                     |
|    |                                                                                                              |                   |                     |
| 8  | Patents planned, issued or pending                                                                           | ___ None          |                     |
|    |                                                                                                              |                   |                     |
|    |                                                                                                              |                   |                     |
| 9  | Participation on a Data Safety Monitoring Board or Advisory Board                                            | ___ None          |                     |
|    |                                                                                                              |                   |                     |
|    |                                                                                                              |                   |                     |
| 10 | Leadership or fiduciary role in other board, society, committee or advocacy group, paid or unpaid            | ___ None          |                     |
|    |                                                                                                              |                   |                     |
|    |                                                                                                              |                   |                     |
| 11 | Stock or stock options                                                                                       | ___ None          |                     |
|    |                                                                                                              |                   |                     |
|    |                                                                                                              |                   |                     |
| 12 | Receipt of equipment, materials, drugs, medical writing, gifts or other services                             | ___ None          |                     |
|    |                                                                                                              |                   |                     |
|    |                                                                                                              |                   |                     |
| 13 | Other financial or non-financial interests                                                                   | ___ None          |                     |
|    |                                                                                                              |                   |                     |
|    |                                                                                                              |                   |                     |

Please place an "X" next to the following statement to indicate your agreement:

  x   I certify that I have answered every question and have not altered the wording of any of the questions on this form.

## ICMJE DISCLOSURE FORM

Date: 11/30/2021

Your Name: Becket Feierbach

Manuscript Title: **Targeted Long-Read Sequencing Reveals Clonally Expanded HBV-Associated Chromosomal Translocations in CHB Patients**

In the interest of transparency, we ask you to disclose all relationships/activities/interests listed below that are related to the content of your manuscript. "Related" means any relation with for-profit or not-for-profit third parties whose interests may be affected by the content of the manuscript. Disclosure represents a commitment to transparency and does not necessarily indicate a bias. If you are in doubt about whether to list a relationship/activity/interest, it is preferable that you do so.

The following questions apply to the author's relationships/activities/interests as they relate to the **current manuscript only**.

The author's relationships/activities/interests should be **defined broadly**. For example, if your manuscript pertains to the epidemiology of hypertension, you should declare all relationships with manufacturers of antihypertensive medication, even if that medication is not mentioned in the manuscript.

In item #1 below, report all support for the work reported in this manuscript without time limit. For all other items, the time frame for disclosure is the past 36 months.

|                                                           |                                                                                                                                                                                | Name all entities with whom you have this relationship or indicate none (add rows as needed) | Specifications/Comments (e.g., if payments were made to you or to your institution)                   |
|-----------------------------------------------------------|--------------------------------------------------------------------------------------------------------------------------------------------------------------------------------|----------------------------------------------------------------------------------------------|-------------------------------------------------------------------------------------------------------|
| <b>Time frame: Since the initial planning of the work</b> |                                                                                                                                                                                |                                                                                              |                                                                                                       |
| 1                                                         | All support for the present manuscript (e.g., funding, provision of study materials, medical writing, article processing charges, etc.)<br><b>No time limit for this item.</b> | <input type="checkbox"/> None                                                                | I am a current employee of Gilead Sciences Inc. The research was funded whole by Gilead Sciences Inc. |
|                                                           |                                                                                                                                                                                | Gilead Sciences Inc                                                                          |                                                                                                       |
|                                                           |                                                                                                                                                                                |                                                                                              |                                                                                                       |
|                                                           |                                                                                                                                                                                |                                                                                              |                                                                                                       |
|                                                           |                                                                                                                                                                                |                                                                                              |                                                                                                       |
|                                                           |                                                                                                                                                                                |                                                                                              |                                                                                                       |
|                                                           |                                                                                                                                                                                |                                                                                              |                                                                                                       |
| <b>Time frame: past 36 months</b>                         |                                                                                                                                                                                |                                                                                              |                                                                                                       |
| 2                                                         | Grants or contracts from any entity (if not indicated in item #1 above).                                                                                                       | <input checked="" type="checkbox"/> None                                                     |                                                                                                       |
|                                                           |                                                                                                                                                                                |                                                                                              |                                                                                                       |
| 3                                                         | Royalties or licenses                                                                                                                                                          | <input checked="" type="checkbox"/> None                                                     |                                                                                                       |
|                                                           |                                                                                                                                                                                |                                                                                              |                                                                                                       |
|                                                           |                                                                                                                                                                                |                                                                                              |                                                                                                       |

|    |                                                                                                              |                                                      |                                                                                              |
|----|--------------------------------------------------------------------------------------------------------------|------------------------------------------------------|----------------------------------------------------------------------------------------------|
| 4  | Consulting fees                                                                                              | <input checked="" type="checkbox"/> None             |                                                                                              |
|    |                                                                                                              |                                                      |                                                                                              |
|    |                                                                                                              |                                                      |                                                                                              |
| 5  | Payment or honoraria for lectures, presentations, speakers bureaus, manuscript writing or educational events | <input checked="" type="checkbox"/> None             |                                                                                              |
|    |                                                                                                              |                                                      |                                                                                              |
|    |                                                                                                              |                                                      |                                                                                              |
| 6  | Payment for expert testimony                                                                                 | <input checked="" type="checkbox"/> None             |                                                                                              |
|    |                                                                                                              |                                                      |                                                                                              |
|    |                                                                                                              |                                                      |                                                                                              |
| 7  | Support for attending meetings and/or travel                                                                 | <input type="checkbox"/> None                        | I have presented this work at EASL 2021 and my attendance was funded by Gilead Sciences Inc. |
|    |                                                                                                              | Gilead Sciences Inc                                  |                                                                                              |
|    |                                                                                                              |                                                      |                                                                                              |
| 8  | Patents planned, issued or pending                                                                           | <input checked="" type="checkbox"/> None             |                                                                                              |
|    |                                                                                                              |                                                      |                                                                                              |
|    |                                                                                                              |                                                      |                                                                                              |
| 9  | Participation on a Data Safety Monitoring Board or Advisory Board                                            | <input checked="" type="checkbox"/> None             |                                                                                              |
|    |                                                                                                              |                                                      |                                                                                              |
|    |                                                                                                              |                                                      |                                                                                              |
| 10 | Leadership or fiduciary role in other board, society, committee or advocacy group, paid or unpaid            | <input checked="" type="checkbox"/> None             |                                                                                              |
|    |                                                                                                              |                                                      |                                                                                              |
|    |                                                                                                              |                                                      |                                                                                              |
| 11 | Stock or stock options                                                                                       | <input type="checkbox"/> None<br>Gilead Sciences Inc | As an employee of Gilead Sciences, I have received and still own Restricted Stock Units      |
|    |                                                                                                              |                                                      |                                                                                              |
|    |                                                                                                              |                                                      |                                                                                              |
| 12 | Receipt of equipment, materials, drugs, medical writing, gifts or other services                             | <input checked="" type="checkbox"/> None             |                                                                                              |
|    |                                                                                                              |                                                      |                                                                                              |
|    |                                                                                                              |                                                      |                                                                                              |
| 13 | Other financial or non-financial interests                                                                   | <input checked="" type="checkbox"/> None             |                                                                                              |
|    |                                                                                                              |                                                      |                                                                                              |
|    |                                                                                                              |                                                      |                                                                                              |

Please place an "X" next to the following statement to indicate your agreement:

I certify that I have answered every question and have not altered the wording of any of the questions on this form.

## ICMJE DISCLOSURE FORM

Date: 11/30/2021

Your Name: Dong Han

Manuscript Title: Targeted Long-Read Sequencing Reveals Clonally Expanded HBV-Associated Chromosomal Translocations in CHB Patients

(if known): \_\_\_\_\_

In the interest of transparency, we ask you to disclose all relationships/activities/interests listed below that are related to the content of your manuscript. "Related" means any relation with for-profit or not-for-profit third parties whose interests may be affected by the content of the manuscript. Disclosure represents a commitment to transparency and does not necessarily indicate a bias. If you are in doubt about whether to list a relationship/activity/interest, it is preferable that you do so.

The following questions apply to the author's relationships/activities/interests as they relate to the current manuscript only.

The author's relationships/activities/interests should be defined broadly. For example, if your manuscript pertains to the epidemiology of hypertension, you should declare all relationships with manufacturers of antihypertensive medication, even if that medication is not mentioned in the manuscript.

In item #1 below, report all support for the work reported in this manuscript without time limit. For all other items, the time frame for disclosure is the past 36 months.

|                                                           |                                                                                                                                                                                | Name all entities with whom you have this relationship or indicate none (add rows as needed) | Specifications/Comments (e.g., if payments were made to you or to your institution)                   |
|-----------------------------------------------------------|--------------------------------------------------------------------------------------------------------------------------------------------------------------------------------|----------------------------------------------------------------------------------------------|-------------------------------------------------------------------------------------------------------|
| <b>Time frame: Since the initial planning of the work</b> |                                                                                                                                                                                |                                                                                              |                                                                                                       |
| 1                                                         | All support for the present manuscript (e.g., funding, provision of study materials, medical writing, article processing charges, etc.)<br><b>No time limit for this item.</b> | <input type="checkbox"/> None<br>Gilead Sciences Inc                                         | I am a current employee of Gilead Sciences Inc. The research was funded whole by Gilead Sciences Inc. |
|                                                           |                                                                                                                                                                                |                                                                                              |                                                                                                       |
|                                                           |                                                                                                                                                                                |                                                                                              |                                                                                                       |
|                                                           |                                                                                                                                                                                |                                                                                              |                                                                                                       |
|                                                           |                                                                                                                                                                                |                                                                                              |                                                                                                       |
|                                                           |                                                                                                                                                                                |                                                                                              |                                                                                                       |
| <b>Time frame: past 36 months</b>                         |                                                                                                                                                                                |                                                                                              |                                                                                                       |
| 2                                                         | Grants or contracts from any entity (if not indicated in item #1 above).                                                                                                       | <input checked="" type="checkbox"/> None                                                     |                                                                                                       |
|                                                           |                                                                                                                                                                                |                                                                                              |                                                                                                       |
| 3                                                         | Royalties or licenses                                                                                                                                                          | <input checked="" type="checkbox"/> None                                                     |                                                                                                       |
|                                                           |                                                                                                                                                                                |                                                                                              |                                                                                                       |

|    |                                                                                                              |                                                      |                                                                                              |
|----|--------------------------------------------------------------------------------------------------------------|------------------------------------------------------|----------------------------------------------------------------------------------------------|
|    |                                                                                                              |                                                      |                                                                                              |
| 4  | Consulting fees                                                                                              | <input checked="" type="checkbox"/> None             |                                                                                              |
|    |                                                                                                              |                                                      |                                                                                              |
|    |                                                                                                              |                                                      |                                                                                              |
| 5  | Payment or honoraria for lectures, presentations, speakers bureaus, manuscript writing or educational events | <input checked="" type="checkbox"/> None             |                                                                                              |
|    |                                                                                                              |                                                      |                                                                                              |
|    |                                                                                                              |                                                      |                                                                                              |
| 6  | Payment for expert testimony                                                                                 | <input checked="" type="checkbox"/> None             |                                                                                              |
|    |                                                                                                              |                                                      |                                                                                              |
|    |                                                                                                              |                                                      |                                                                                              |
| 7  | Support for attending meetings and/or travel                                                                 | <input type="checkbox"/> None                        | I have presented this work at EASL 2021 and my attendance was funded by Gilead Sciences Inc. |
|    |                                                                                                              | Gilead Sciences Inc                                  |                                                                                              |
|    |                                                                                                              |                                                      |                                                                                              |
| 8  | Patents planned, issued or pending                                                                           | <input checked="" type="checkbox"/> None             |                                                                                              |
|    |                                                                                                              |                                                      |                                                                                              |
|    |                                                                                                              |                                                      |                                                                                              |
| 9  | Participation on a Data Safety Monitoring Board or Advisory Board                                            | <input checked="" type="checkbox"/> None             |                                                                                              |
|    |                                                                                                              |                                                      |                                                                                              |
|    |                                                                                                              |                                                      |                                                                                              |
| 10 | Leadership or fiduciary role in other board, society, committee or advocacy group, paid or unpaid            | <input checked="" type="checkbox"/> None             |                                                                                              |
|    |                                                                                                              |                                                      |                                                                                              |
|    |                                                                                                              |                                                      |                                                                                              |
| 11 | Stock or stock options                                                                                       | <input type="checkbox"/> None<br>Gilead Sciences Inc | As an employee of Gilead Sciences, I have received and still own Restricted Stock Units      |
|    |                                                                                                              |                                                      |                                                                                              |
|    |                                                                                                              |                                                      |                                                                                              |
| 12 | Receipt of equipment, materials, drugs, medical writing, gifts or other services                             | <input checked="" type="checkbox"/> None             |                                                                                              |
|    |                                                                                                              |                                                      |                                                                                              |
|    |                                                                                                              |                                                      |                                                                                              |
| 13 | Other financial or non-financial interests                                                                   | <input checked="" type="checkbox"/> None             |                                                                                              |
|    |                                                                                                              |                                                      |                                                                                              |
|    |                                                                                                              |                                                      |                                                                                              |

Please place an "X" next to the following statement to indicate your agreement:

I certify that I have answered every question and have not altered the wording of any of the questions on this form.



## ICMJE DISCLOSURE FORM

Date: 11/30/2021

Your Name: Hongmei Mo

Manuscript Title: Targeted Long-Read Sequencing Reveals Clonally Expanded HBV-Associated Chromosomal Translocations in CHB Patients

In the interest of transparency, we ask you to disclose all relationships/activities/interests listed below that are related to the content of your manuscript. "Related" means any relation with for-profit or not-for-profit third parties whose interests may be affected by the content of the manuscript. Disclosure represents a commitment to transparency and does not necessarily indicate a bias. If you are in doubt about whether to list a relationship/activity/interest, it is preferable that you do so.

The following questions apply to the author's relationships/activities/interests as they relate to the current manuscript only.

The author's relationships/activities/interests should be defined broadly. For example, if your manuscript pertains to the epidemiology of hypertension, you should declare all relationships with manufacturers of antihypertensive medication, even if that medication is not mentioned in the manuscript.

In item #1 below, report all support for the work reported in this manuscript without time limit. For all other items, the time frame for disclosure is the past 36 months.

|                                                           |                                                                                                                                                                                | Name all entities with whom you have this relationship or indicate none (add rows as needed) | Specifications/Comments (e.g., if payments were made to you or to your institution)                   |
|-----------------------------------------------------------|--------------------------------------------------------------------------------------------------------------------------------------------------------------------------------|----------------------------------------------------------------------------------------------|-------------------------------------------------------------------------------------------------------|
| <b>Time frame: Since the initial planning of the work</b> |                                                                                                                                                                                |                                                                                              |                                                                                                       |
| 1                                                         | All support for the present manuscript (e.g., funding, provision of study materials, medical writing, article processing charges, etc.)<br><b>No time limit for this item.</b> | <input type="checkbox"/> None                                                                | I am a current employee of Gilead Sciences Inc. The research was funded whole by Gilead Sciences Inc. |
|                                                           |                                                                                                                                                                                | Gilead Sciences Inc                                                                          |                                                                                                       |
|                                                           |                                                                                                                                                                                |                                                                                              |                                                                                                       |
|                                                           |                                                                                                                                                                                |                                                                                              |                                                                                                       |
|                                                           |                                                                                                                                                                                |                                                                                              |                                                                                                       |
|                                                           |                                                                                                                                                                                |                                                                                              |                                                                                                       |
| <b>Time frame: past 36 months</b>                         |                                                                                                                                                                                |                                                                                              |                                                                                                       |
| 2                                                         | Grants or contracts from any entity (if not indicated in item #1 above).                                                                                                       | <input checked="" type="checkbox"/> None                                                     |                                                                                                       |
|                                                           |                                                                                                                                                                                |                                                                                              |                                                                                                       |
|                                                           |                                                                                                                                                                                |                                                                                              |                                                                                                       |
| 3                                                         | Royalties or licenses                                                                                                                                                          | <input checked="" type="checkbox"/> None                                                     |                                                                                                       |
|                                                           |                                                                                                                                                                                |                                                                                              |                                                                                                       |

|    |                                                                                                              |                                                      |                                                                                              |
|----|--------------------------------------------------------------------------------------------------------------|------------------------------------------------------|----------------------------------------------------------------------------------------------|
|    |                                                                                                              |                                                      |                                                                                              |
| 4  | Consulting fees                                                                                              | <input checked="" type="checkbox"/> None             |                                                                                              |
|    |                                                                                                              |                                                      |                                                                                              |
|    |                                                                                                              |                                                      |                                                                                              |
| 5  | Payment or honoraria for lectures, presentations, speakers bureaus, manuscript writing or educational events | <input checked="" type="checkbox"/> None             |                                                                                              |
|    |                                                                                                              |                                                      |                                                                                              |
|    |                                                                                                              |                                                      |                                                                                              |
| 6  | Payment for expert testimony                                                                                 | <input checked="" type="checkbox"/> None             |                                                                                              |
|    |                                                                                                              |                                                      |                                                                                              |
|    |                                                                                                              |                                                      |                                                                                              |
| 7  | Support for attending meetings and/or travel                                                                 | <input type="checkbox"/> None                        | I have presented this work at EASL 2021 and my attendance was funded by Gilead Sciences Inc. |
|    |                                                                                                              | Gilead Sciences Inc                                  |                                                                                              |
|    |                                                                                                              |                                                      |                                                                                              |
| 8  | Patents planned, issued or pending                                                                           | <input checked="" type="checkbox"/> None             |                                                                                              |
|    |                                                                                                              |                                                      |                                                                                              |
|    |                                                                                                              |                                                      |                                                                                              |
| 9  | Participation on a Data Safety Monitoring Board or Advisory Board                                            | <input checked="" type="checkbox"/> None             |                                                                                              |
|    |                                                                                                              |                                                      |                                                                                              |
|    |                                                                                                              |                                                      |                                                                                              |
| 10 | Leadership or fiduciary role in other board, society, committee or advocacy group, paid or unpaid            | <input checked="" type="checkbox"/> None             |                                                                                              |
|    |                                                                                                              |                                                      |                                                                                              |
|    |                                                                                                              |                                                      |                                                                                              |
| 11 | Stock or stock options                                                                                       | <input type="checkbox"/> None<br>Gilead Sciences Inc | As an employee of Gilead Sciences, I have received and still own Restricted Stock Units      |
|    |                                                                                                              |                                                      |                                                                                              |
|    |                                                                                                              |                                                      |                                                                                              |
| 12 | Receipt of equipment, materials, drugs, medical writing, gifts or other services                             | <input checked="" type="checkbox"/> None             |                                                                                              |
|    |                                                                                                              |                                                      |                                                                                              |
|    |                                                                                                              |                                                      |                                                                                              |
| 13 | Other financial or non-financial interests                                                                   | <input checked="" type="checkbox"/> None             |                                                                                              |
|    |                                                                                                              |                                                      |                                                                                              |
|    |                                                                                                              |                                                      |                                                                                              |

Please place an "X" next to the following statement to indicate your agreement:

I certify that I have answered every question and have not altered the wording of any of the questions on this form.



## ICMJE DISCLOSURE FORM

Date: 11/30/2021

Your Name: Li Li

Manuscript Title: **Targeted Long-Read Sequencing Reveals Clonally Expanded HBV-Associated Chromosomal Translocations in CHB Patients**

In the interest of transparency, we ask you to disclose all relationships/activities/interests listed below that are related to the content of your manuscript. "Related" means any relation with for-profit or not-for-profit third parties whose interests may be affected by the content of the manuscript. Disclosure represents a commitment to transparency and does not necessarily indicate a bias. If you are in doubt about whether to list a relationship/activity/interest, it is preferable that you do so.

The following questions apply to the author's relationships/activities/interests as they relate to the **current manuscript only**.

The author's relationships/activities/interests should be **defined broadly**. For example, if your manuscript pertains to the epidemiology of hypertension, you should declare all relationships with manufacturers of antihypertensive medication, even if that medication is not mentioned in the manuscript.

In item #1 below, report all support for the work reported in this manuscript without time limit. For all other items, the time frame for disclosure is the past 36 months.

|                                                           |                                                                                                                                                                                | Name all entities with whom you have this relationship or indicate none (add rows as needed) | Specifications/Comments (e.g., if payments were made to you or to your institution)                   |
|-----------------------------------------------------------|--------------------------------------------------------------------------------------------------------------------------------------------------------------------------------|----------------------------------------------------------------------------------------------|-------------------------------------------------------------------------------------------------------|
| <b>Time frame: Since the initial planning of the work</b> |                                                                                                                                                                                |                                                                                              |                                                                                                       |
| 1                                                         | All support for the present manuscript (e.g., funding, provision of study materials, medical writing, article processing charges, etc.)<br><b>No time limit for this item.</b> | <input type="checkbox"/> None                                                                | I am a current employee of Gilead Sciences Inc. The research was funded whole by Gilead Sciences Inc. |
|                                                           |                                                                                                                                                                                | Gilead Sciences Inc                                                                          |                                                                                                       |
|                                                           |                                                                                                                                                                                |                                                                                              |                                                                                                       |
|                                                           |                                                                                                                                                                                |                                                                                              |                                                                                                       |
|                                                           |                                                                                                                                                                                |                                                                                              |                                                                                                       |
|                                                           |                                                                                                                                                                                |                                                                                              |                                                                                                       |
|                                                           |                                                                                                                                                                                |                                                                                              |                                                                                                       |
| <b>Time frame: past 36 months</b>                         |                                                                                                                                                                                |                                                                                              |                                                                                                       |
| 2                                                         | Grants or contracts from any entity (if not indicated in item #1 above).                                                                                                       | <input checked="" type="checkbox"/> None                                                     |                                                                                                       |
|                                                           |                                                                                                                                                                                |                                                                                              |                                                                                                       |
|                                                           |                                                                                                                                                                                |                                                                                              |                                                                                                       |
| 3                                                         | Royalties or licenses                                                                                                                                                          | <input checked="" type="checkbox"/> None                                                     |                                                                                                       |
|                                                           |                                                                                                                                                                                |                                                                                              |                                                                                                       |
|                                                           |                                                                                                                                                                                |                                                                                              |                                                                                                       |

|    |                                                                                                              |                                                      |                                                                                              |
|----|--------------------------------------------------------------------------------------------------------------|------------------------------------------------------|----------------------------------------------------------------------------------------------|
| 4  | Consulting fees                                                                                              | <input checked="" type="checkbox"/> None             |                                                                                              |
|    |                                                                                                              |                                                      |                                                                                              |
|    |                                                                                                              |                                                      |                                                                                              |
| 5  | Payment or honoraria for lectures, presentations, speakers bureaus, manuscript writing or educational events | <input checked="" type="checkbox"/> None             |                                                                                              |
|    |                                                                                                              |                                                      |                                                                                              |
|    |                                                                                                              |                                                      |                                                                                              |
| 6  | Payment for expert testimony                                                                                 | <input checked="" type="checkbox"/> None             |                                                                                              |
|    |                                                                                                              |                                                      |                                                                                              |
|    |                                                                                                              |                                                      |                                                                                              |
| 7  | Support for attending meetings and/or travel                                                                 | <input type="checkbox"/> None                        | I have presented this work at EASL 2021 and my attendance was funded by Gilead Sciences Inc. |
|    |                                                                                                              | Gilead Sciences Inc                                  |                                                                                              |
|    |                                                                                                              |                                                      |                                                                                              |
| 8  | Patents planned, issued or pending                                                                           | <input checked="" type="checkbox"/> None             |                                                                                              |
|    |                                                                                                              |                                                      |                                                                                              |
|    |                                                                                                              |                                                      |                                                                                              |
| 9  | Participation on a Data Safety Monitoring Board or Advisory Board                                            | <input checked="" type="checkbox"/> None             |                                                                                              |
|    |                                                                                                              |                                                      |                                                                                              |
|    |                                                                                                              |                                                      |                                                                                              |
| 10 | Leadership or fiduciary role in other board, society, committee or advocacy group, paid or unpaid            | <input checked="" type="checkbox"/> None             |                                                                                              |
|    |                                                                                                              |                                                      |                                                                                              |
|    |                                                                                                              |                                                      |                                                                                              |
| 11 | Stock or stock options                                                                                       | <input type="checkbox"/> None<br>Gilead Sciences Inc | As an employee of Gilead Sciences, I have received and still own Restricted Stock Units      |
|    |                                                                                                              |                                                      |                                                                                              |
|    |                                                                                                              |                                                      |                                                                                              |
| 12 | Receipt of equipment, materials, drugs, medical writing, gifts or other services                             | <input checked="" type="checkbox"/> None             |                                                                                              |
|    |                                                                                                              |                                                      |                                                                                              |
|    |                                                                                                              |                                                      |                                                                                              |
| 13 | Other financial or non-financial interests                                                                   | <input checked="" type="checkbox"/> None             |                                                                                              |
|    |                                                                                                              |                                                      |                                                                                              |
|    |                                                                                                              |                                                      |                                                                                              |

Please place an "X" next to the following statement to indicate your agreement:

I certify that I have answered every question and have not altered the wording of any of the questions on this form.

## ICMJE DISCLOSURE FORM

Date: 11/30/2021

Your Name: Maria Buti

Manuscript Title: Targeted Long-Read Sequencing Reveals Clonally Expanded HBV-Associated Chromosomal Translocations in CHB Patients

Manuscript number (if known): \_\_\_\_\_

In the interest of transparency, we ask you to disclose all relationships/activities/interests listed below that are related to the content of your manuscript. “Related” means any relation with for-profit or not-for-profit third parties whose interests may be affected by the content of the manuscript. Disclosure represents a commitment to transparency and does not necessarily indicate a bias. If you are in doubt about whether to list a relationship/activity/interest, it is preferable that you do so.

The following questions apply to the author’s relationships/activities/interests as they relate to the **current manuscript only**.

The author’s relationships/activities/interests should be **defined broadly**. For example, if your manuscript pertains to the epidemiology of hypertension, you should declare all relationships with manufacturers of antihypertensive medication, even if that medication is not mentioned in the manuscript.

In item #1 below, report all support for the work reported in this manuscript without time limit. For all other items, the time frame for disclosure is the past 36 months.

|                                                           |                                                                                                                                                                                | Name all entities with whom you have this relationship or indicate none (add rows as needed) | Specifications/Comments (e.g., if payments were made to you or to your institution) |
|-----------------------------------------------------------|--------------------------------------------------------------------------------------------------------------------------------------------------------------------------------|----------------------------------------------------------------------------------------------|-------------------------------------------------------------------------------------|
| <b>Time frame: Since the initial planning of the work</b> |                                                                                                                                                                                |                                                                                              |                                                                                     |
| 1                                                         | All support for the present manuscript (e.g., funding, provision of study materials, medical writing, article processing charges, etc.)<br><b>No time limit for this item.</b> | ___ None                                                                                     |                                                                                     |
|                                                           |                                                                                                                                                                                |                                                                                              |                                                                                     |
|                                                           |                                                                                                                                                                                |                                                                                              |                                                                                     |
|                                                           |                                                                                                                                                                                |                                                                                              |                                                                                     |
|                                                           |                                                                                                                                                                                |                                                                                              |                                                                                     |
|                                                           |                                                                                                                                                                                |                                                                                              |                                                                                     |
| <b>Time frame: past 36 months</b>                         |                                                                                                                                                                                |                                                                                              |                                                                                     |
| 2                                                         | Grants or contracts from any entity (if not indicated in item #1 above).                                                                                                       | ___ None                                                                                     |                                                                                     |
|                                                           |                                                                                                                                                                                |                                                                                              |                                                                                     |
|                                                           |                                                                                                                                                                                |                                                                                              |                                                                                     |
| 3                                                         | Royalties or licenses                                                                                                                                                          | ___ None                                                                                     |                                                                                     |

|    |                                                                                                              |                      |  |
|----|--------------------------------------------------------------------------------------------------------------|----------------------|--|
|    |                                                                                                              |                      |  |
| 4  | Consulting fees                                                                                              | ___ Gilead<br>Abbvie |  |
|    |                                                                                                              |                      |  |
| 5  | Payment or honoraria for lectures, presentations, speakers bureaus, manuscript writing or educational events | ___ Gilead<br>Abbvie |  |
|    |                                                                                                              |                      |  |
| 6  | Payment for expert testimony                                                                                 | ___ None             |  |
|    |                                                                                                              |                      |  |
| 7  | Support for attending meetings and/or travel                                                                 | ___ None             |  |
|    |                                                                                                              |                      |  |
| 8  | Patents planned, issued or pending                                                                           | ___ None             |  |
|    |                                                                                                              |                      |  |
| 9  | Participation on a Data Safety Monitoring Board or Advisory Board                                            | ___ None             |  |
|    |                                                                                                              |                      |  |
| 10 | Leadership or fiduciary role in other board, society, committee or advocacy group, paid or unpaid            | ___ None             |  |
|    |                                                                                                              |                      |  |
| 11 | Stock or stock options                                                                                       | ___ None             |  |
|    |                                                                                                              |                      |  |
| 12 | Receipt of equipment, materials, drugs, medical writing, gifts or other services                             | ___ None             |  |
|    |                                                                                                              |                      |  |
| 13 | Other financial or non-financial interests                                                                   | ___ None             |  |
|    |                                                                                                              |                      |  |

Please place an "X" next to the following statement to indicate your agreement:

X

\_\_\_ I certify that I have answered every question and have not altered the wording of any of the questions on this

form.

## ICMJE DISCLOSURE FORM

Date: 11/30/2021

Your Name: Ross Martin

Manuscript Title: Targeted Long-Read Sequencing Reveals Clonally Expanded HBV-Associated Chromosomal Translocations in CHB Patients

(if known): \_\_\_\_\_

In the interest of transparency, we ask you to disclose all relationships/activities/interests listed below that are related to the content of your manuscript. "Related" means any relation with for-profit or not-for-profit third parties whose interests may be affected by the content of the manuscript. Disclosure represents a commitment to transparency and does not necessarily indicate a bias. If you are in doubt about whether to list a relationship/activity/interest, it is preferable that you do so.

The following questions apply to the author's relationships/activities/interests as they relate to the current manuscript only.

The author's relationships/activities/interests should be defined broadly. For example, if your manuscript pertains to the epidemiology of hypertension, you should declare all relationships with manufacturers of antihypertensive medication, even if that medication is not mentioned in the manuscript.

In item #1 below, report all support for the work reported in this manuscript without time limit. For all other items, the time frame for disclosure is the past 36 months.

|                                                           |                                                                                                                                                                                | Name all entities with whom you have this relationship or indicate none (add rows as needed) | Specifications/Comments (e.g., if payments were made to you or to your institution)                   |
|-----------------------------------------------------------|--------------------------------------------------------------------------------------------------------------------------------------------------------------------------------|----------------------------------------------------------------------------------------------|-------------------------------------------------------------------------------------------------------|
| <b>Time frame: Since the initial planning of the work</b> |                                                                                                                                                                                |                                                                                              |                                                                                                       |
| 1                                                         | All support for the present manuscript (e.g., funding, provision of study materials, medical writing, article processing charges, etc.)<br><b>No time limit for this item.</b> | <input type="checkbox"/> None                                                                | I am a current employee of Gilead Sciences Inc. The research was funded whole by Gilead Sciences Inc. |
|                                                           |                                                                                                                                                                                | Gilead Sciences Inc                                                                          |                                                                                                       |
|                                                           |                                                                                                                                                                                |                                                                                              |                                                                                                       |
|                                                           |                                                                                                                                                                                |                                                                                              |                                                                                                       |
|                                                           |                                                                                                                                                                                |                                                                                              |                                                                                                       |
|                                                           |                                                                                                                                                                                |                                                                                              |                                                                                                       |
| <b>Time frame: past 36 months</b>                         |                                                                                                                                                                                |                                                                                              |                                                                                                       |
| 2                                                         | Grants or contracts from any entity (if not indicated in item #1 above).                                                                                                       | <input checked="" type="checkbox"/> None                                                     |                                                                                                       |
|                                                           |                                                                                                                                                                                |                                                                                              |                                                                                                       |
| 3                                                         | Royalties or licenses                                                                                                                                                          | <input checked="" type="checkbox"/> None                                                     |                                                                                                       |
|                                                           |                                                                                                                                                                                |                                                                                              |                                                                                                       |

|    |                                                                                                              |                                                      |                                                                                              |
|----|--------------------------------------------------------------------------------------------------------------|------------------------------------------------------|----------------------------------------------------------------------------------------------|
|    |                                                                                                              |                                                      |                                                                                              |
| 4  | Consulting fees                                                                                              | <input checked="" type="checkbox"/> None             |                                                                                              |
|    |                                                                                                              |                                                      |                                                                                              |
|    |                                                                                                              |                                                      |                                                                                              |
| 5  | Payment or honoraria for lectures, presentations, speakers bureaus, manuscript writing or educational events | <input checked="" type="checkbox"/> None             |                                                                                              |
|    |                                                                                                              |                                                      |                                                                                              |
|    |                                                                                                              |                                                      |                                                                                              |
| 6  | Payment for expert testimony                                                                                 | <input checked="" type="checkbox"/> None             |                                                                                              |
|    |                                                                                                              |                                                      |                                                                                              |
|    |                                                                                                              |                                                      |                                                                                              |
| 7  | Support for attending meetings and/or travel                                                                 | <input type="checkbox"/> None                        | I have presented this work at EASL 2021 and my attendance was funded by Gilead Sciences Inc. |
|    |                                                                                                              | Gilead Sciences Inc                                  |                                                                                              |
|    |                                                                                                              |                                                      |                                                                                              |
| 8  | Patents planned, issued or pending                                                                           | <input checked="" type="checkbox"/> None             |                                                                                              |
|    |                                                                                                              |                                                      |                                                                                              |
|    |                                                                                                              |                                                      |                                                                                              |
| 9  | Participation on a Data Safety Monitoring Board or Advisory Board                                            | <input checked="" type="checkbox"/> None             |                                                                                              |
|    |                                                                                                              |                                                      |                                                                                              |
|    |                                                                                                              |                                                      |                                                                                              |
| 10 | Leadership or fiduciary role in other board, society, committee or advocacy group, paid or unpaid            | <input checked="" type="checkbox"/> None             |                                                                                              |
|    |                                                                                                              |                                                      |                                                                                              |
|    |                                                                                                              |                                                      |                                                                                              |
| 11 | Stock or stock options                                                                                       | <input type="checkbox"/> None<br>Gilead Sciences Inc | As an employee of Gilead Sciences, I have received and still own Restricted Stock Units      |
|    |                                                                                                              |                                                      |                                                                                              |
|    |                                                                                                              |                                                      |                                                                                              |
| 12 | Receipt of equipment, materials, drugs, medical writing, gifts or other services                             | <input checked="" type="checkbox"/> None             |                                                                                              |
|    |                                                                                                              |                                                      |                                                                                              |
|    |                                                                                                              |                                                      |                                                                                              |
| 13 | Other financial or non-financial interests                                                                   | <input checked="" type="checkbox"/> None             |                                                                                              |
|    |                                                                                                              |                                                      |                                                                                              |
|    |                                                                                                              |                                                      |                                                                                              |

Please place an "X" next to the following statement to indicate your agreement:

I certify that I have answered every question and have not altered the wording of any of the questions on this form.



## ICMJE DISCLOSURE FORM

Date: 11/30/2021

Your Name: Lindsey May

Manuscript Title: Targeted Long-Read Sequencing Reveals Clonally Expanded HBV-Associated Chromosomal Translocations in CHB Patients

(if known): \_\_\_\_\_

In the interest of transparency, we ask you to disclose all relationships/activities/interests listed below that are related to the content of your manuscript. "Related" means any relation with for-profit or not-for-profit third parties whose interests may be affected by the content of the manuscript. Disclosure represents a commitment to transparency and does not necessarily indicate a bias. If you are in doubt about whether to list a relationship/activity/interest, it is preferable that you do so.

The following questions apply to the author's relationships/activities/interests as they relate to the **current manuscript only**.

The author's relationships/activities/interests should be **defined broadly**. For example, if your manuscript pertains to the epidemiology of hypertension, you should declare all relationships with manufacturers of antihypertensive medication, even if that medication is not mentioned in the manuscript.

In item #1 below, report all support for the work reported in this manuscript without time limit. For all other items, the time frame for disclosure is the past 36 months.

|                                                           |                                                                                                                                                                                | Name all entities with whom you have this relationship or indicate none (add rows as needed) | Specifications/Comments (e.g., if payments were made to you or to your institution)                   |
|-----------------------------------------------------------|--------------------------------------------------------------------------------------------------------------------------------------------------------------------------------|----------------------------------------------------------------------------------------------|-------------------------------------------------------------------------------------------------------|
| <b>Time frame: Since the initial planning of the work</b> |                                                                                                                                                                                |                                                                                              |                                                                                                       |
| 1                                                         | All support for the present manuscript (e.g., funding, provision of study materials, medical writing, article processing charges, etc.)<br><b>No time limit for this item.</b> | <input type="checkbox"/> None                                                                | I am a current employee of Gilead Sciences Inc. The research was funded whole by Gilead Sciences Inc. |
|                                                           |                                                                                                                                                                                | Gilead Sciences Inc                                                                          |                                                                                                       |
|                                                           |                                                                                                                                                                                |                                                                                              |                                                                                                       |
|                                                           |                                                                                                                                                                                |                                                                                              |                                                                                                       |
|                                                           |                                                                                                                                                                                |                                                                                              |                                                                                                       |
|                                                           |                                                                                                                                                                                |                                                                                              |                                                                                                       |
| <b>Time frame: past 36 months</b>                         |                                                                                                                                                                                |                                                                                              |                                                                                                       |
| 2                                                         | Grants or contracts from any entity (if not indicated in item #1 above).                                                                                                       | <input checked="" type="checkbox"/> None                                                     |                                                                                                       |
|                                                           |                                                                                                                                                                                |                                                                                              |                                                                                                       |
| 3                                                         | Royalties or licenses                                                                                                                                                          | <input checked="" type="checkbox"/> None                                                     |                                                                                                       |
|                                                           |                                                                                                                                                                                |                                                                                              |                                                                                                       |

|    |                                                                                                              |                                                      |                                                                                              |
|----|--------------------------------------------------------------------------------------------------------------|------------------------------------------------------|----------------------------------------------------------------------------------------------|
|    |                                                                                                              |                                                      |                                                                                              |
| 4  | Consulting fees                                                                                              | <input checked="" type="checkbox"/> None             |                                                                                              |
|    |                                                                                                              |                                                      |                                                                                              |
|    |                                                                                                              |                                                      |                                                                                              |
| 5  | Payment or honoraria for lectures, presentations, speakers bureaus, manuscript writing or educational events | <input checked="" type="checkbox"/> None             |                                                                                              |
|    |                                                                                                              |                                                      |                                                                                              |
|    |                                                                                                              |                                                      |                                                                                              |
| 6  | Payment for expert testimony                                                                                 | <input checked="" type="checkbox"/> None             |                                                                                              |
|    |                                                                                                              |                                                      |                                                                                              |
|    |                                                                                                              |                                                      |                                                                                              |
| 7  | Support for attending meetings and/or travel                                                                 | <input type="checkbox"/> None                        | I have presented this work at EASL 2021 and my attendance was funded by Gilead Sciences Inc. |
|    |                                                                                                              | Gilead Sciences Inc                                  |                                                                                              |
|    |                                                                                                              |                                                      |                                                                                              |
| 8  | Patents planned, issued or pending                                                                           | <input checked="" type="checkbox"/> None             |                                                                                              |
|    |                                                                                                              |                                                      |                                                                                              |
|    |                                                                                                              |                                                      |                                                                                              |
| 9  | Participation on a Data Safety Monitoring Board or Advisory Board                                            | <input checked="" type="checkbox"/> None             |                                                                                              |
|    |                                                                                                              |                                                      |                                                                                              |
|    |                                                                                                              |                                                      |                                                                                              |
| 10 | Leadership or fiduciary role in other board, society, committee or advocacy group, paid or unpaid            | <input checked="" type="checkbox"/> None             |                                                                                              |
|    |                                                                                                              |                                                      |                                                                                              |
|    |                                                                                                              |                                                      |                                                                                              |
| 11 | Stock or stock options                                                                                       | <input type="checkbox"/> None<br>Gilead Sciences Inc | As an employee of Gilead Sciences, I have received and still own Restricted Stock Units      |
|    |                                                                                                              |                                                      |                                                                                              |
|    |                                                                                                              |                                                      |                                                                                              |
| 12 | Receipt of equipment, materials, drugs, medical writing, gifts or other services                             | <input checked="" type="checkbox"/> None             |                                                                                              |
|    |                                                                                                              |                                                      |                                                                                              |
|    |                                                                                                              |                                                      |                                                                                              |
| 13 | Other financial or non-financial interests                                                                   | <input checked="" type="checkbox"/> None             |                                                                                              |
|    |                                                                                                              |                                                      |                                                                                              |
|    |                                                                                                              |                                                      |                                                                                              |

Please place an "X" next to the following statement to indicate your agreement:

I certify that I have answered every question and have not altered the wording of any of the questions on this form.



## ICMJE DISCLOSURE FORM

Date: 11/30/2021

Your Name: Nam Bui

Manuscript Title: Targeted Long-Read Sequencing Reveals Clonally Expanded HBV-Associated Chromosomal Translocations in CHB Patients

(if known): \_\_\_\_\_

In the interest of transparency, we ask you to disclose all relationships/activities/interests listed below that are related to the content of your manuscript. "Related" means any relation with for-profit or not-for-profit third parties whose interests may be affected by the content of the manuscript. Disclosure represents a commitment to transparency and does not necessarily indicate a bias. If you are in doubt about whether to list a relationship/activity/interest, it is preferable that you do so.

The following questions apply to the author's relationships/activities/interests as they relate to the **current manuscript only**.

The author's relationships/activities/interests should be **defined broadly**. For example, if your manuscript pertains to the epidemiology of hypertension, you should declare all relationships with manufacturers of antihypertensive medication, even if that medication is not mentioned in the manuscript.

In item #1 below, report all support for the work reported in this manuscript without time limit. For all other items, the time frame for disclosure is the past 36 months.

|                                                           |                                                                                                                                                                                | Name all entities with whom you have this relationship or indicate none (add rows as needed) | Specifications/Comments (e.g., if payments were made to you or to your institution)                   |
|-----------------------------------------------------------|--------------------------------------------------------------------------------------------------------------------------------------------------------------------------------|----------------------------------------------------------------------------------------------|-------------------------------------------------------------------------------------------------------|
| <b>Time frame: Since the initial planning of the work</b> |                                                                                                                                                                                |                                                                                              |                                                                                                       |
| 1                                                         | All support for the present manuscript (e.g., funding, provision of study materials, medical writing, article processing charges, etc.)<br><b>No time limit for this item.</b> | <input type="checkbox"/> None<br>Gilead Sciences Inc                                         | I am a current employee of Gilead Sciences Inc. The research was funded whole by Gilead Sciences Inc. |
|                                                           |                                                                                                                                                                                |                                                                                              |                                                                                                       |
|                                                           |                                                                                                                                                                                |                                                                                              |                                                                                                       |
|                                                           |                                                                                                                                                                                |                                                                                              |                                                                                                       |
|                                                           |                                                                                                                                                                                |                                                                                              |                                                                                                       |
|                                                           |                                                                                                                                                                                |                                                                                              |                                                                                                       |
| <b>Time frame: past 36 months</b>                         |                                                                                                                                                                                |                                                                                              |                                                                                                       |
| 2                                                         | Grants or contracts from any entity (if not indicated in item #1 above).                                                                                                       | <input checked="" type="checkbox"/> None                                                     |                                                                                                       |
|                                                           |                                                                                                                                                                                |                                                                                              |                                                                                                       |
| 3                                                         | Royalties or licenses                                                                                                                                                          | <input checked="" type="checkbox"/> None                                                     |                                                                                                       |
|                                                           |                                                                                                                                                                                |                                                                                              |                                                                                                       |

|    |                                                                                                              |                                                      |                                                                                              |
|----|--------------------------------------------------------------------------------------------------------------|------------------------------------------------------|----------------------------------------------------------------------------------------------|
|    |                                                                                                              |                                                      |                                                                                              |
| 4  | Consulting fees                                                                                              | <input checked="" type="checkbox"/> None             |                                                                                              |
|    |                                                                                                              |                                                      |                                                                                              |
|    |                                                                                                              |                                                      |                                                                                              |
| 5  | Payment or honoraria for lectures, presentations, speakers bureaus, manuscript writing or educational events | <input checked="" type="checkbox"/> None             |                                                                                              |
|    |                                                                                                              |                                                      |                                                                                              |
|    |                                                                                                              |                                                      |                                                                                              |
| 6  | Payment for expert testimony                                                                                 | <input checked="" type="checkbox"/> None             |                                                                                              |
|    |                                                                                                              |                                                      |                                                                                              |
|    |                                                                                                              |                                                      |                                                                                              |
| 7  | Support for attending meetings and/or travel                                                                 | <input type="checkbox"/> None                        | I have presented this work at EASL 2021 and my attendance was funded by Gilead Sciences Inc. |
|    |                                                                                                              | Gilead Sciences Inc                                  |                                                                                              |
|    |                                                                                                              |                                                      |                                                                                              |
| 8  | Patents planned, issued or pending                                                                           | <input checked="" type="checkbox"/> None             |                                                                                              |
|    |                                                                                                              |                                                      |                                                                                              |
|    |                                                                                                              |                                                      |                                                                                              |
| 9  | Participation on a Data Safety Monitoring Board or Advisory Board                                            | <input checked="" type="checkbox"/> None             |                                                                                              |
|    |                                                                                                              |                                                      |                                                                                              |
|    |                                                                                                              |                                                      |                                                                                              |
| 10 | Leadership or fiduciary role in other board, society, committee or advocacy group, paid or unpaid            | <input checked="" type="checkbox"/> None             |                                                                                              |
|    |                                                                                                              |                                                      |                                                                                              |
|    |                                                                                                              |                                                      |                                                                                              |
| 11 | Stock or stock options                                                                                       | <input type="checkbox"/> None<br>Gilead Sciences Inc | As an employee of Gilead Sciences, I have received and still own Restricted Stock Units      |
|    |                                                                                                              |                                                      |                                                                                              |
|    |                                                                                                              |                                                      |                                                                                              |
| 12 | Receipt of equipment, materials, drugs, medical writing, gifts or other services                             | <input checked="" type="checkbox"/> None             |                                                                                              |
|    |                                                                                                              |                                                      |                                                                                              |
|    |                                                                                                              |                                                      |                                                                                              |
| 13 | Other financial or non-financial interests                                                                   | <input checked="" type="checkbox"/> None             |                                                                                              |
|    |                                                                                                              |                                                      |                                                                                              |
|    |                                                                                                              |                                                      |                                                                                              |

Please place an "X" next to the following statement to indicate your agreement:

I certify that I have answered every question and have not altered the wording of any of the questions on this form.



## ICMJE DISCLOSURE FORM

**Date:** 11/30/2021

**Your Name:** Neeru Bhardwaj

**Manuscript Title:** Targeted Long-Read Sequencing Reveals Clonally Expanded HBV-Associated Chromosomal Translocations in CHB Patients

**Manuscript number (if known):** \_\_\_\_\_

In the interest of transparency, we ask you to disclose all relationships/activities/interests listed below that are related to the content of your manuscript. "Related" means any relation with for-profit or not-for-profit third parties whose interests may be affected by the content of the manuscript. Disclosure represents a commitment to transparency and does not necessarily indicate a bias. If you are in doubt about whether to list a relationship/activity/interest, it is preferable that you do so.

The following questions apply to the author's relationships/activities/interests as they relate to the current manuscript only.

The author's relationships/activities/interests should be defined broadly. For example, if your manuscript pertains to the epidemiology of hypertension, you should declare all relationships with manufacturers of antihypertensive medication, even if that medication is not mentioned in the manuscript.

In item #1 below, report all support for the work reported in this manuscript without time limit. For all other items, the time frame for disclosure is the past 36 months.

|                                                           |                                                                                                                                                                                | Name all entities with whom you have this relationship or indicate none (add rows as needed) | Specifications/Comments (e.g., if payments were made to you or to your institution) |
|-----------------------------------------------------------|--------------------------------------------------------------------------------------------------------------------------------------------------------------------------------|----------------------------------------------------------------------------------------------|-------------------------------------------------------------------------------------|
| <b>Time frame: Since the initial planning of the work</b> |                                                                                                                                                                                |                                                                                              |                                                                                     |
| 1                                                         | All support for the present manuscript (e.g., funding, provision of study materials, medical writing, article processing charges, etc.)<br><b>No time limit for this item.</b> | ___ None                                                                                     | Was previously employed at Gilead (2015-2018)                                       |
|                                                           |                                                                                                                                                                                |                                                                                              |                                                                                     |
|                                                           |                                                                                                                                                                                |                                                                                              |                                                                                     |
|                                                           |                                                                                                                                                                                |                                                                                              |                                                                                     |
|                                                           |                                                                                                                                                                                |                                                                                              |                                                                                     |
|                                                           |                                                                                                                                                                                |                                                                                              |                                                                                     |
| <b>Time frame: past 36 months</b>                         |                                                                                                                                                                                |                                                                                              |                                                                                     |
| 2                                                         | Grants or contracts from any entity (if not indicated in item #1 above).                                                                                                       | __X__ None                                                                                   |                                                                                     |
|                                                           |                                                                                                                                                                                |                                                                                              |                                                                                     |
|                                                           |                                                                                                                                                                                |                                                                                              |                                                                                     |
| 3                                                         | Royalties or licenses                                                                                                                                                          | __X__ None                                                                                   |                                                                                     |
|                                                           |                                                                                                                                                                                |                                                                                              |                                                                                     |

|    |                                                                                                              |                                          |                                                    |
|----|--------------------------------------------------------------------------------------------------------------|------------------------------------------|----------------------------------------------------|
|    |                                                                                                              |                                          |                                                    |
| 4  | Consulting fees                                                                                              | <input checked="" type="checkbox"/> None |                                                    |
|    |                                                                                                              |                                          |                                                    |
|    |                                                                                                              |                                          |                                                    |
| 5  | Payment or honoraria for lectures, presentations, speakers bureaus, manuscript writing or educational events | <input checked="" type="checkbox"/> None |                                                    |
|    |                                                                                                              |                                          |                                                    |
|    |                                                                                                              |                                          |                                                    |
| 6  | Payment for expert testimony                                                                                 | <input checked="" type="checkbox"/> None |                                                    |
|    |                                                                                                              |                                          |                                                    |
|    |                                                                                                              |                                          |                                                    |
| 7  | Support for attending meetings and/or travel                                                                 | <input checked="" type="checkbox"/> None |                                                    |
|    |                                                                                                              |                                          |                                                    |
|    |                                                                                                              |                                          |                                                    |
| 8  | Patents planned, issued or pending                                                                           | <input checked="" type="checkbox"/> None |                                                    |
|    |                                                                                                              |                                          |                                                    |
|    |                                                                                                              |                                          |                                                    |
| 9  | Participation on a Data Safety Monitoring Board or Advisory Board                                            | <input checked="" type="checkbox"/> None |                                                    |
|    |                                                                                                              |                                          |                                                    |
|    |                                                                                                              |                                          |                                                    |
| 10 | Leadership or fiduciary role in other board, society, committee or advocacy group, paid or unpaid            | <input checked="" type="checkbox"/> None |                                                    |
|    |                                                                                                              |                                          |                                                    |
|    |                                                                                                              |                                          |                                                    |
| 11 | Stock or stock options                                                                                       | <input type="checkbox"/> None            | Received company stock while an employee at Gilead |
|    |                                                                                                              |                                          |                                                    |
|    |                                                                                                              |                                          |                                                    |
| 12 | Receipt of equipment, materials, drugs, medical writing, gifts or other services                             | <input checked="" type="checkbox"/> None |                                                    |
|    |                                                                                                              |                                          |                                                    |
|    |                                                                                                              |                                          |                                                    |
| 13 | Other financial or non-financial interests                                                                   | <input checked="" type="checkbox"/> None |                                                    |
|    |                                                                                                              |                                          |                                                    |
|    |                                                                                                              |                                          |                                                    |

Please place an "X" next to the following statement to indicate your agreement:

I certify that I have answered every question and have not altered the wording of any of the questions on this form.

## ICMJE DISCLOSURE FORM

Date: 11/30/2021

Your Name: PC Parvangada

Manuscript Title: Targeted Long-Read Sequencing Reveals Clonally Expanded HBV-Associated Chromosomal Translocations in CHB Patients  
 (if known): \_\_\_\_\_

In the interest of transparency, we ask you to disclose all relationships/activities/interests listed below that are related to the content of your manuscript. "Related" means any relation with for-profit or not-for-profit third parties whose interests may be affected by the content of the manuscript. Disclosure represents a commitment to transparency and does not necessarily indicate a bias. If you are in doubt about whether to list a relationship/activity/interest, it is preferable that you do so.

The following questions apply to the author's relationships/activities/interests as they relate to the **current manuscript only**.

The author's relationships/activities/interests should be **defined broadly**. For example, if your manuscript pertains to the epidemiology of hypertension, you should declare all relationships with manufacturers of antihypertensive medication, even if that medication is not mentioned in the manuscript.

In item #1 below, report all support for the work reported in this manuscript without time limit. For all other items, the time frame for disclosure is the past 36 months.

|                                                           |                                                                                                                                                                                | Name all entities with whom you have this relationship or indicate none (add rows as needed) | Specifications/Comments (e.g., if payments were made to you or to your institution)                   |
|-----------------------------------------------------------|--------------------------------------------------------------------------------------------------------------------------------------------------------------------------------|----------------------------------------------------------------------------------------------|-------------------------------------------------------------------------------------------------------|
| <b>Time frame: Since the initial planning of the work</b> |                                                                                                                                                                                |                                                                                              |                                                                                                       |
| 1                                                         | All support for the present manuscript (e.g., funding, provision of study materials, medical writing, article processing charges, etc.)<br><b>No time limit for this item.</b> | <input type="checkbox"/> None                                                                | I am a current employee of Gilead Sciences Inc. The research was funded whole by Gilead Sciences Inc. |
|                                                           |                                                                                                                                                                                | Gilead Sciences Inc                                                                          |                                                                                                       |
|                                                           |                                                                                                                                                                                |                                                                                              |                                                                                                       |
|                                                           |                                                                                                                                                                                |                                                                                              |                                                                                                       |
|                                                           |                                                                                                                                                                                |                                                                                              |                                                                                                       |
|                                                           |                                                                                                                                                                                |                                                                                              |                                                                                                       |
| <b>Time frame: past 36 months</b>                         |                                                                                                                                                                                |                                                                                              |                                                                                                       |
| 2                                                         | Grants or contracts from any entity (if not indicated in item #1 above).                                                                                                       | <input checked="" type="checkbox"/> None                                                     |                                                                                                       |
|                                                           |                                                                                                                                                                                |                                                                                              |                                                                                                       |
| 3                                                         | Royalties or licenses                                                                                                                                                          | <input checked="" type="checkbox"/> None                                                     |                                                                                                       |
|                                                           |                                                                                                                                                                                |                                                                                              |                                                                                                       |

|    |                                                                                                              |                                                      |                                                                                              |
|----|--------------------------------------------------------------------------------------------------------------|------------------------------------------------------|----------------------------------------------------------------------------------------------|
|    |                                                                                                              |                                                      |                                                                                              |
| 4  | Consulting fees                                                                                              | <input checked="" type="checkbox"/> None             |                                                                                              |
|    |                                                                                                              |                                                      |                                                                                              |
|    |                                                                                                              |                                                      |                                                                                              |
| 5  | Payment or honoraria for lectures, presentations, speakers bureaus, manuscript writing or educational events | <input checked="" type="checkbox"/> None             |                                                                                              |
|    |                                                                                                              |                                                      |                                                                                              |
|    |                                                                                                              |                                                      |                                                                                              |
| 6  | Payment for expert testimony                                                                                 | <input checked="" type="checkbox"/> None             |                                                                                              |
|    |                                                                                                              |                                                      |                                                                                              |
|    |                                                                                                              |                                                      |                                                                                              |
| 7  | Support for attending meetings and/or travel                                                                 | <input type="checkbox"/> None                        | I have presented this work at EASL 2021 and my attendance was funded by Gilead Sciences Inc. |
|    |                                                                                                              | Gilead Sciences Inc                                  |                                                                                              |
|    |                                                                                                              |                                                      |                                                                                              |
| 8  | Patents planned, issued or pending                                                                           | <input checked="" type="checkbox"/> None             |                                                                                              |
|    |                                                                                                              |                                                      |                                                                                              |
|    |                                                                                                              |                                                      |                                                                                              |
| 9  | Participation on a Data Safety Monitoring Board or Advisory Board                                            | <input checked="" type="checkbox"/> None             |                                                                                              |
|    |                                                                                                              |                                                      |                                                                                              |
|    |                                                                                                              |                                                      |                                                                                              |
| 10 | Leadership or fiduciary role in other board, society, committee or advocacy group, paid or unpaid            | <input checked="" type="checkbox"/> None             |                                                                                              |
|    |                                                                                                              |                                                      |                                                                                              |
|    |                                                                                                              |                                                      |                                                                                              |
| 11 | Stock or stock options                                                                                       | <input type="checkbox"/> None<br>Gilead Sciences Inc | As an employee of Gilead Sciences, I have received and still own Restricted Stock Units      |
|    |                                                                                                              |                                                      |                                                                                              |
|    |                                                                                                              |                                                      |                                                                                              |
| 12 | Receipt of equipment, materials, drugs, medical writing, gifts or other services                             | <input checked="" type="checkbox"/> None             |                                                                                              |
|    |                                                                                                              |                                                      |                                                                                              |
|    |                                                                                                              |                                                      |                                                                                              |
| 13 | Other financial or non-financial interests                                                                   | <input checked="" type="checkbox"/> None             |                                                                                              |
|    |                                                                                                              |                                                      |                                                                                              |
|    |                                                                                                              |                                                      |                                                                                              |

Please place an "X" next to the following statement to indicate your agreement:

I certify that I have answered every question and have not altered the wording of any of the questions on this form.



## ICMJE DISCLOSURE FORM

Date: 11/30/2021

Your Name: Ricardo Ramirez

Manuscript Title: **Targeted Long-Read Sequencing Reveals Clonally Expanded HBV-Associated Chromosomal Translocations in CHB Patients**

In the interest of transparency, we ask you to disclose all relationships/activities/interests listed below that are related to the content of your manuscript. "Related" means any relation with for-profit or not-for-profit third parties whose interests may be affected by the content of the manuscript. Disclosure represents a commitment to transparency and does not necessarily indicate a bias. If you are in doubt about whether to list a relationship/activity/interest, it is preferable that you do so.

The following questions apply to the author's relationships/activities/interests as they relate to the **current manuscript only**.

The author's relationships/activities/interests should be **defined broadly**. For example, if your manuscript pertains to the epidemiology of hypertension, you should declare all relationships with manufacturers of antihypertensive medication, even if that medication is not mentioned in the manuscript.

In item #1 below, report all support for the work reported in this manuscript without time limit. For all other items, the time frame for disclosure is the past 36 months.

|                                                           |                                                                                                                                                                                | Name all entities with whom you have this relationship or indicate none (add rows as needed) | Specifications/Comments (e.g., if payments were made to you or to your institution)                   |
|-----------------------------------------------------------|--------------------------------------------------------------------------------------------------------------------------------------------------------------------------------|----------------------------------------------------------------------------------------------|-------------------------------------------------------------------------------------------------------|
| <b>Time frame: Since the initial planning of the work</b> |                                                                                                                                                                                |                                                                                              |                                                                                                       |
| 1                                                         | All support for the present manuscript (e.g., funding, provision of study materials, medical writing, article processing charges, etc.)<br><b>No time limit for this item.</b> | <input type="checkbox"/> None                                                                | I am a current employee of Gilead Sciences Inc. The research was funded whole by Gilead Sciences Inc. |
|                                                           |                                                                                                                                                                                | Gilead Sciences Inc                                                                          |                                                                                                       |
|                                                           |                                                                                                                                                                                |                                                                                              |                                                                                                       |
|                                                           |                                                                                                                                                                                |                                                                                              |                                                                                                       |
|                                                           |                                                                                                                                                                                |                                                                                              |                                                                                                       |
|                                                           |                                                                                                                                                                                |                                                                                              |                                                                                                       |
|                                                           |                                                                                                                                                                                |                                                                                              |                                                                                                       |
| <b>Time frame: past 36 months</b>                         |                                                                                                                                                                                |                                                                                              |                                                                                                       |
| 2                                                         | Grants or contracts from any entity (if not indicated in item #1 above).                                                                                                       | <input checked="" type="checkbox"/> None                                                     |                                                                                                       |
|                                                           |                                                                                                                                                                                |                                                                                              |                                                                                                       |
| 3                                                         | Royalties or licenses                                                                                                                                                          | <input checked="" type="checkbox"/> None                                                     |                                                                                                       |
|                                                           |                                                                                                                                                                                |                                                                                              |                                                                                                       |
|                                                           |                                                                                                                                                                                |                                                                                              |                                                                                                       |

|    |                                                                                                              |                                                      |                                                                                              |
|----|--------------------------------------------------------------------------------------------------------------|------------------------------------------------------|----------------------------------------------------------------------------------------------|
| 4  | Consulting fees                                                                                              | <input checked="" type="checkbox"/> None             |                                                                                              |
|    |                                                                                                              |                                                      |                                                                                              |
|    |                                                                                                              |                                                      |                                                                                              |
| 5  | Payment or honoraria for lectures, presentations, speakers bureaus, manuscript writing or educational events | <input checked="" type="checkbox"/> None             |                                                                                              |
|    |                                                                                                              |                                                      |                                                                                              |
|    |                                                                                                              |                                                      |                                                                                              |
| 6  | Payment for expert testimony                                                                                 | <input checked="" type="checkbox"/> None             |                                                                                              |
|    |                                                                                                              |                                                      |                                                                                              |
|    |                                                                                                              |                                                      |                                                                                              |
| 7  | Support for attending meetings and/or travel                                                                 | <input type="checkbox"/> None                        | I have presented this work at EASL 2021 and my attendance was funded by Gilead Sciences Inc. |
|    |                                                                                                              | Gilead Sciences Inc                                  |                                                                                              |
|    |                                                                                                              |                                                      |                                                                                              |
| 8  | Patents planned, issued or pending                                                                           | <input checked="" type="checkbox"/> None             |                                                                                              |
|    |                                                                                                              |                                                      |                                                                                              |
|    |                                                                                                              |                                                      |                                                                                              |
| 9  | Participation on a Data Safety Monitoring Board or Advisory Board                                            | <input checked="" type="checkbox"/> None             |                                                                                              |
|    |                                                                                                              |                                                      |                                                                                              |
|    |                                                                                                              |                                                      |                                                                                              |
| 10 | Leadership or fiduciary role in other board, society, committee or advocacy group, paid or unpaid            | <input checked="" type="checkbox"/> None             |                                                                                              |
|    |                                                                                                              |                                                      |                                                                                              |
|    |                                                                                                              |                                                      |                                                                                              |
| 11 | Stock or stock options                                                                                       | <input type="checkbox"/> None<br>Gilead Sciences Inc | As an employee of Gilead Sciences, I have received and still own Restricted Stock Units      |
|    |                                                                                                              |                                                      |                                                                                              |
|    |                                                                                                              |                                                      |                                                                                              |
| 12 | Receipt of equipment, materials, drugs, medical writing, gifts or other services                             | <input checked="" type="checkbox"/> None             |                                                                                              |
|    |                                                                                                              |                                                      |                                                                                              |
|    |                                                                                                              |                                                      |                                                                                              |
| 13 | Other financial or non-financial interests                                                                   | <input checked="" type="checkbox"/> None             |                                                                                              |
|    |                                                                                                              |                                                      |                                                                                              |
|    |                                                                                                              |                                                      |                                                                                              |

Please place an "X" next to the following statement to indicate your agreement:

I certify that I have answered every question and have not altered the wording of any of the questions on this form.

## ICMJE DISCLOSURE FORM

Date: 11/30/2021

Your Name: Cameron Soulette

Manuscript Title: Targeted Long-Read Sequencing Reveals Clonally Expanded HBV-Associated Chromosomal Translocations in CHB Patients

(if known): \_\_\_\_\_

In the interest of transparency, we ask you to disclose all relationships/activities/interests listed below that are related to the content of your manuscript. "Related" means any relation with for-profit or not-for-profit third parties whose interests may be affected by the content of the manuscript. Disclosure represents a commitment to transparency and does not necessarily indicate a bias. If you are in doubt about whether to list a relationship/activity/interest, it is preferable that you do so.

The following questions apply to the author's relationships/activities/interests as they relate to the **current manuscript only**.

The author's relationships/activities/interests should be **defined broadly**. For example, if your manuscript pertains to the epidemiology of hypertension, you should declare all relationships with manufacturers of antihypertensive medication, even if that medication is not mentioned in the manuscript.

In item #1 below, report all support for the work reported in this manuscript without time limit. For all other items, the time frame for disclosure is the past 36 months.

|                                                           |                                                                                                                                                                                | Name all entities with whom you have this relationship or indicate none (add rows as needed) | Specifications/Comments (e.g., if payments were made to you or to your institution)                   |
|-----------------------------------------------------------|--------------------------------------------------------------------------------------------------------------------------------------------------------------------------------|----------------------------------------------------------------------------------------------|-------------------------------------------------------------------------------------------------------|
| <b>Time frame: Since the initial planning of the work</b> |                                                                                                                                                                                |                                                                                              |                                                                                                       |
| 1                                                         | All support for the present manuscript (e.g., funding, provision of study materials, medical writing, article processing charges, etc.)<br><b>No time limit for this item.</b> | <input type="checkbox"/> None                                                                | I am a current employee of Gilead Sciences Inc. The research was funded whole by Gilead Sciences Inc. |
|                                                           |                                                                                                                                                                                | Gilead Sciences Inc                                                                          |                                                                                                       |
|                                                           |                                                                                                                                                                                |                                                                                              |                                                                                                       |
|                                                           |                                                                                                                                                                                |                                                                                              |                                                                                                       |
|                                                           |                                                                                                                                                                                |                                                                                              |                                                                                                       |
|                                                           |                                                                                                                                                                                |                                                                                              |                                                                                                       |
| <b>Time frame: past 36 months</b>                         |                                                                                                                                                                                |                                                                                              |                                                                                                       |
| 2                                                         | Grants or contracts from any entity (if not indicated in item #1 above).                                                                                                       | <input checked="" type="checkbox"/> None                                                     |                                                                                                       |
|                                                           |                                                                                                                                                                                |                                                                                              |                                                                                                       |
|                                                           |                                                                                                                                                                                |                                                                                              |                                                                                                       |
| 3                                                         | Royalties or licenses                                                                                                                                                          | <input checked="" type="checkbox"/> None                                                     |                                                                                                       |
|                                                           |                                                                                                                                                                                |                                                                                              |                                                                                                       |

|    |                                                                                                              |                                                      |                                                                                              |
|----|--------------------------------------------------------------------------------------------------------------|------------------------------------------------------|----------------------------------------------------------------------------------------------|
|    |                                                                                                              |                                                      |                                                                                              |
| 4  | Consulting fees                                                                                              | <input checked="" type="checkbox"/> None             |                                                                                              |
|    |                                                                                                              |                                                      |                                                                                              |
|    |                                                                                                              |                                                      |                                                                                              |
| 5  | Payment or honoraria for lectures, presentations, speakers bureaus, manuscript writing or educational events | <input checked="" type="checkbox"/> None             |                                                                                              |
|    |                                                                                                              |                                                      |                                                                                              |
|    |                                                                                                              |                                                      |                                                                                              |
| 6  | Payment for expert testimony                                                                                 | <input checked="" type="checkbox"/> None             |                                                                                              |
|    |                                                                                                              |                                                      |                                                                                              |
|    |                                                                                                              |                                                      |                                                                                              |
| 7  | Support for attending meetings and/or travel                                                                 | <input type="checkbox"/> None                        | I have presented this work at EASL 2021 and my attendance was funded by Gilead Sciences Inc. |
|    |                                                                                                              | Gilead Sciences Inc                                  |                                                                                              |
|    |                                                                                                              |                                                      |                                                                                              |
| 8  | Patents planned, issued or pending                                                                           | <input checked="" type="checkbox"/> None             |                                                                                              |
|    |                                                                                                              |                                                      |                                                                                              |
|    |                                                                                                              |                                                      |                                                                                              |
| 9  | Participation on a Data Safety Monitoring Board or Advisory Board                                            | <input checked="" type="checkbox"/> None             |                                                                                              |
|    |                                                                                                              |                                                      |                                                                                              |
|    |                                                                                                              |                                                      |                                                                                              |
| 10 | Leadership or fiduciary role in other board, society, committee or advocacy group, paid or unpaid            | <input checked="" type="checkbox"/> None             |                                                                                              |
|    |                                                                                                              |                                                      |                                                                                              |
|    |                                                                                                              |                                                      |                                                                                              |
| 11 | Stock or stock options                                                                                       | <input type="checkbox"/> None<br>Gilead Sciences Inc | As an employee of Gilead Sciences, I have received and still own Restricted Stock Units      |
|    |                                                                                                              |                                                      |                                                                                              |
|    |                                                                                                              |                                                      |                                                                                              |
| 12 | Receipt of equipment, materials, drugs, medical writing, gifts or other services                             | <input checked="" type="checkbox"/> None             |                                                                                              |
|    |                                                                                                              |                                                      |                                                                                              |
|    |                                                                                                              |                                                      |                                                                                              |
| 13 | Other financial or non-financial interests                                                                   | <input checked="" type="checkbox"/> None             |                                                                                              |
|    |                                                                                                              |                                                      |                                                                                              |
|    |                                                                                                              |                                                      |                                                                                              |

Please place an "X" next to the following statement to indicate your agreement:

I certify that I have answered every question and have not altered the wording of any of the questions on this form.



## ICMJE DISCLOSURE FORM

Date: 11/30/2021

Your Name: Scott Turner

Manuscript Title: : **Targeted Long-Read Sequencing Reveals Clonally Expanded HBV-Associated Chromosomal Translocations in CHB Patients**

In the interest of transparency, we ask you to disclose all relationships/activities/interests listed below that are related to the content of your manuscript. "Related" means any relation with for-profit or not-for-profit third parties whose interests may be affected by the content of the manuscript. Disclosure represents a commitment to transparency and does not necessarily indicate a bias. If you are in doubt about whether to list a relationship/activity/interest, it is preferable that you do so.

The following questions apply to the author's relationships/activities/interests as they relate to the **current manuscript only**.

The author's relationships/activities/interests should be **defined broadly**. For example, if your manuscript pertains to the epidemiology of hypertension, you should declare all relationships with manufacturers of antihypertensive medication, even if that medication is not mentioned in the manuscript.

In item #1 below, report all support for the work reported in this manuscript without time limit. For all other items, the time frame for disclosure is the past 36 months.

|                                                           |                                                                                                                                                                                | Name all entities with whom you have this relationship or indicate none (add rows as needed) | Specifications/Comments (e.g., if payments were made to you or to your institution)                   |
|-----------------------------------------------------------|--------------------------------------------------------------------------------------------------------------------------------------------------------------------------------|----------------------------------------------------------------------------------------------|-------------------------------------------------------------------------------------------------------|
| <b>Time frame: Since the initial planning of the work</b> |                                                                                                                                                                                |                                                                                              |                                                                                                       |
| 1                                                         | All support for the present manuscript (e.g., funding, provision of study materials, medical writing, article processing charges, etc.)<br><b>No time limit for this item.</b> | <input type="checkbox"/> None                                                                | I am a current employee of Gilead Sciences Inc. The research was funded whole by Gilead Sciences Inc. |
|                                                           |                                                                                                                                                                                | Gilead Sciences Inc                                                                          |                                                                                                       |
|                                                           |                                                                                                                                                                                |                                                                                              |                                                                                                       |
|                                                           |                                                                                                                                                                                |                                                                                              |                                                                                                       |
|                                                           |                                                                                                                                                                                |                                                                                              |                                                                                                       |
|                                                           |                                                                                                                                                                                |                                                                                              |                                                                                                       |
|                                                           |                                                                                                                                                                                |                                                                                              |                                                                                                       |
| <b>Time frame: past 36 months</b>                         |                                                                                                                                                                                |                                                                                              |                                                                                                       |
| 2                                                         | Grants or contracts from any entity (if not indicated in item #1 above).                                                                                                       | <input checked="" type="checkbox"/> None                                                     |                                                                                                       |
|                                                           |                                                                                                                                                                                |                                                                                              |                                                                                                       |
|                                                           |                                                                                                                                                                                |                                                                                              |                                                                                                       |
| 3                                                         | Royalties or licenses                                                                                                                                                          | <input checked="" type="checkbox"/> None                                                     |                                                                                                       |
|                                                           |                                                                                                                                                                                |                                                                                              |                                                                                                       |
|                                                           |                                                                                                                                                                                |                                                                                              |                                                                                                       |

|    |                                                                                                              |                                                      |                                                                                              |
|----|--------------------------------------------------------------------------------------------------------------|------------------------------------------------------|----------------------------------------------------------------------------------------------|
| 4  | Consulting fees                                                                                              | <input checked="" type="checkbox"/> None             |                                                                                              |
|    |                                                                                                              |                                                      |                                                                                              |
|    |                                                                                                              |                                                      |                                                                                              |
| 5  | Payment or honoraria for lectures, presentations, speakers bureaus, manuscript writing or educational events | <input checked="" type="checkbox"/> None             |                                                                                              |
|    |                                                                                                              |                                                      |                                                                                              |
|    |                                                                                                              |                                                      |                                                                                              |
| 6  | Payment for expert testimony                                                                                 | <input checked="" type="checkbox"/> None             |                                                                                              |
|    |                                                                                                              |                                                      |                                                                                              |
|    |                                                                                                              |                                                      |                                                                                              |
| 7  | Support for attending meetings and/or travel                                                                 | <input type="checkbox"/> None                        | I have presented this work at EASL 2021 and my attendance was funded by Gilead Sciences Inc. |
|    |                                                                                                              | Gilead Sciences Inc                                  |                                                                                              |
|    |                                                                                                              |                                                      |                                                                                              |
| 8  | Patents planned, issued or pending                                                                           | <input checked="" type="checkbox"/> None             |                                                                                              |
|    |                                                                                                              |                                                      |                                                                                              |
|    |                                                                                                              |                                                      |                                                                                              |
| 9  | Participation on a Data Safety Monitoring Board or Advisory Board                                            | <input checked="" type="checkbox"/> None             |                                                                                              |
|    |                                                                                                              |                                                      |                                                                                              |
|    |                                                                                                              |                                                      |                                                                                              |
| 10 | Leadership or fiduciary role in other board, society, committee or advocacy group, paid or unpaid            | <input checked="" type="checkbox"/> None             |                                                                                              |
|    |                                                                                                              |                                                      |                                                                                              |
|    |                                                                                                              |                                                      |                                                                                              |
| 11 | Stock or stock options                                                                                       | <input type="checkbox"/> None<br>Gilead Sciences Inc | As an employee of Gilead Sciences, I have received and still own Restricted Stock Units      |
|    |                                                                                                              |                                                      |                                                                                              |
|    |                                                                                                              |                                                      |                                                                                              |
| 12 | Receipt of equipment, materials, drugs, medical writing, gifts or other services                             | <input checked="" type="checkbox"/> None             |                                                                                              |
|    |                                                                                                              |                                                      |                                                                                              |
|    |                                                                                                              |                                                      |                                                                                              |
| 13 | Other financial or non-financial interests                                                                   | <input checked="" type="checkbox"/> None             |                                                                                              |
|    |                                                                                                              |                                                      |                                                                                              |
|    |                                                                                                              |                                                      |                                                                                              |

Please place an "X" next to the following statement to indicate your agreement:

I certify that I have answered every question and have not altered the wording of any of the questions on this form.

## ICMJE DISCLOSURE FORM

Date: 11/30/2021

Your Name: Vithika Suri

Manuscript Title: : Targeted Long-Read Sequencing Reveals Clonally Expanded HBV-Associated Chromosomal Translocations in CHB Patients

(if known): \_\_\_\_\_

In the interest of transparency, we ask you to disclose all relationships/activities/interests listed below that are related to the content of your manuscript. "Related" means any relation with for-profit or not-for-profit third parties whose interests may be affected by the content of the manuscript. Disclosure represents a commitment to transparency and does not necessarily indicate a bias. If you are in doubt about whether to list a relationship/activity/interest, it is preferable that you do so.

The following questions apply to the author's relationships/activities/interests as they relate to the current manuscript only.

The author's relationships/activities/interests should be defined broadly. For example, if your manuscript pertains to the epidemiology of hypertension, you should declare all relationships with manufacturers of antihypertensive medication, even if that medication is not mentioned in the manuscript.

In item #1 below, report all support for the work reported in this manuscript without time limit. For all other items, the time frame for disclosure is the past 36 months.

|                                                           |                                                                                                                                                                                | Name all entities with whom you have this relationship or indicate none (add rows as needed) | Specifications/Comments (e.g., if payments were made to you or to your institution)                   |
|-----------------------------------------------------------|--------------------------------------------------------------------------------------------------------------------------------------------------------------------------------|----------------------------------------------------------------------------------------------|-------------------------------------------------------------------------------------------------------|
| <b>Time frame: Since the initial planning of the work</b> |                                                                                                                                                                                |                                                                                              |                                                                                                       |
| 1                                                         | All support for the present manuscript (e.g., funding, provision of study materials, medical writing, article processing charges, etc.)<br><b>No time limit for this item.</b> | <input type="checkbox"/> None<br>Gilead Sciences Inc                                         | I am a current employee of Gilead Sciences Inc. The research was funded whole by Gilead Sciences Inc. |
|                                                           |                                                                                                                                                                                |                                                                                              |                                                                                                       |
|                                                           |                                                                                                                                                                                |                                                                                              |                                                                                                       |
|                                                           |                                                                                                                                                                                |                                                                                              |                                                                                                       |
|                                                           |                                                                                                                                                                                |                                                                                              |                                                                                                       |
|                                                           |                                                                                                                                                                                |                                                                                              |                                                                                                       |
| <b>Time frame: past 36 months</b>                         |                                                                                                                                                                                |                                                                                              |                                                                                                       |
| 2                                                         | Grants or contracts from any entity (if not indicated in item #1 above).                                                                                                       | <input checked="" type="checkbox"/> None                                                     |                                                                                                       |
|                                                           |                                                                                                                                                                                |                                                                                              |                                                                                                       |
| 3                                                         | Royalties or licenses                                                                                                                                                          | <input checked="" type="checkbox"/> None                                                     |                                                                                                       |
|                                                           |                                                                                                                                                                                |                                                                                              |                                                                                                       |

|    |                                                                                                              |                                                      |                                                                                              |
|----|--------------------------------------------------------------------------------------------------------------|------------------------------------------------------|----------------------------------------------------------------------------------------------|
|    |                                                                                                              |                                                      |                                                                                              |
| 4  | Consulting fees                                                                                              | <input checked="" type="checkbox"/> None             |                                                                                              |
|    |                                                                                                              |                                                      |                                                                                              |
|    |                                                                                                              |                                                      |                                                                                              |
| 5  | Payment or honoraria for lectures, presentations, speakers bureaus, manuscript writing or educational events | <input checked="" type="checkbox"/> None             |                                                                                              |
|    |                                                                                                              |                                                      |                                                                                              |
|    |                                                                                                              |                                                      |                                                                                              |
| 6  | Payment for expert testimony                                                                                 | <input checked="" type="checkbox"/> None             |                                                                                              |
|    |                                                                                                              |                                                      |                                                                                              |
|    |                                                                                                              |                                                      |                                                                                              |
| 7  | Support for attending meetings and/or travel                                                                 | <input type="checkbox"/> None                        | I have presented this work at EASL 2021 and my attendance was funded by Gilead Sciences Inc. |
|    |                                                                                                              | Gilead Sciences Inc                                  |                                                                                              |
|    |                                                                                                              |                                                      |                                                                                              |
| 8  | Patents planned, issued or pending                                                                           | <input checked="" type="checkbox"/> None             |                                                                                              |
|    |                                                                                                              |                                                      |                                                                                              |
|    |                                                                                                              |                                                      |                                                                                              |
| 9  | Participation on a Data Safety Monitoring Board or Advisory Board                                            | <input checked="" type="checkbox"/> None             |                                                                                              |
|    |                                                                                                              |                                                      |                                                                                              |
|    |                                                                                                              |                                                      |                                                                                              |
| 10 | Leadership or fiduciary role in other board, society, committee or advocacy group, paid or unpaid            | <input checked="" type="checkbox"/> None             |                                                                                              |
|    |                                                                                                              |                                                      |                                                                                              |
|    |                                                                                                              |                                                      |                                                                                              |
| 11 | Stock or stock options                                                                                       | <input type="checkbox"/> None<br>Gilead Sciences Inc | As an employee of Gilead Sciences, I have received and still own Restricted Stock Units      |
|    |                                                                                                              |                                                      |                                                                                              |
|    |                                                                                                              |                                                      |                                                                                              |
| 12 | Receipt of equipment, materials, drugs, medical writing, gifts or other services                             | <input checked="" type="checkbox"/> None             |                                                                                              |
|    |                                                                                                              |                                                      |                                                                                              |
|    |                                                                                                              |                                                      |                                                                                              |
| 13 | Other financial or non-financial interests                                                                   | <input checked="" type="checkbox"/> None             |                                                                                              |
|    |                                                                                                              |                                                      |                                                                                              |
|    |                                                                                                              |                                                      |                                                                                              |

Please place an "X" next to the following statement to indicate your agreement:

I certify that I have answered every question and have not altered the wording of any of the questions on this form.



## ICMJE DISCLOSURE FORM

Date: 11/30/2021

Your Name: Nick van Buuren

Manuscript Title: Targeted Long-Read Sequencing Reveals Clonally Expanded HBV-Associated Chromosomal Translocations in CHB Patients

In the interest of transparency, we ask you to disclose all relationships/activities/interests listed below that are related to the content of your manuscript. "Related" means any relation with for-profit or not-for-profit third parties whose interests may be affected by the content of the manuscript. Disclosure represents a commitment to transparency and does not necessarily indicate a bias. If you are in doubt about whether to list a relationship/activity/interest, it is preferable that you do so.

The following questions apply to the author's relationships/activities/interests as they relate to the current manuscript only.

The author's relationships/activities/interests should be defined broadly. For example, if your manuscript pertains to the epidemiology of hypertension, you should declare all relationships with manufacturers of antihypertensive medication, even if that medication is not mentioned in the manuscript.

In item #1 below, report all support for the work reported in this manuscript without time limit. For all other items, the time frame for disclosure is the past 36 months.

|                                                           |                                                                                                                                                                                | Name all entities with whom you have this relationship or indicate none (add rows as needed) | Specifications/Comments (e.g., if payments were made to you or to your institution)                   |
|-----------------------------------------------------------|--------------------------------------------------------------------------------------------------------------------------------------------------------------------------------|----------------------------------------------------------------------------------------------|-------------------------------------------------------------------------------------------------------|
| <b>Time frame: Since the initial planning of the work</b> |                                                                                                                                                                                |                                                                                              |                                                                                                       |
| 1                                                         | All support for the present manuscript (e.g., funding, provision of study materials, medical writing, article processing charges, etc.)<br><b>No time limit for this item.</b> | <input type="checkbox"/> None                                                                | I am a current employee of Gilead Sciences Inc. The research was funded whole by Gilead Sciences Inc. |
|                                                           |                                                                                                                                                                                | Gilead Sciences Inc                                                                          |                                                                                                       |
|                                                           |                                                                                                                                                                                |                                                                                              |                                                                                                       |
|                                                           |                                                                                                                                                                                |                                                                                              |                                                                                                       |
|                                                           |                                                                                                                                                                                |                                                                                              |                                                                                                       |
|                                                           |                                                                                                                                                                                |                                                                                              |                                                                                                       |
| <b>Time frame: past 36 months</b>                         |                                                                                                                                                                                |                                                                                              |                                                                                                       |
| 2                                                         | Grants or contracts from any entity (if not indicated in item #1 above).                                                                                                       | <input checked="" type="checkbox"/> None                                                     |                                                                                                       |
|                                                           |                                                                                                                                                                                |                                                                                              |                                                                                                       |
|                                                           |                                                                                                                                                                                |                                                                                              |                                                                                                       |
| 3                                                         | Royalties or licenses                                                                                                                                                          | <input checked="" type="checkbox"/> None                                                     |                                                                                                       |
|                                                           |                                                                                                                                                                                |                                                                                              |                                                                                                       |

|    |                                                                                                              |                                                      |                                                                                              |
|----|--------------------------------------------------------------------------------------------------------------|------------------------------------------------------|----------------------------------------------------------------------------------------------|
|    |                                                                                                              |                                                      |                                                                                              |
| 4  | Consulting fees                                                                                              | <input checked="" type="checkbox"/> None             |                                                                                              |
|    |                                                                                                              |                                                      |                                                                                              |
|    |                                                                                                              |                                                      |                                                                                              |
| 5  | Payment or honoraria for lectures, presentations, speakers bureaus, manuscript writing or educational events | <input checked="" type="checkbox"/> None             |                                                                                              |
|    |                                                                                                              |                                                      |                                                                                              |
|    |                                                                                                              |                                                      |                                                                                              |
| 6  | Payment for expert testimony                                                                                 | <input checked="" type="checkbox"/> None             |                                                                                              |
|    |                                                                                                              |                                                      |                                                                                              |
|    |                                                                                                              |                                                      |                                                                                              |
| 7  | Support for attending meetings and/or travel                                                                 | <input type="checkbox"/> None                        | I have presented this work at EASL 2021 and my attendance was funded by Gilead Sciences Inc. |
|    |                                                                                                              | Gilead Sciences Inc                                  |                                                                                              |
|    |                                                                                                              |                                                      |                                                                                              |
| 8  | Patents planned, issued or pending                                                                           | <input checked="" type="checkbox"/> None             |                                                                                              |
|    |                                                                                                              |                                                      |                                                                                              |
|    |                                                                                                              |                                                      |                                                                                              |
| 9  | Participation on a Data Safety Monitoring Board or Advisory Board                                            | <input checked="" type="checkbox"/> None             |                                                                                              |
|    |                                                                                                              |                                                      |                                                                                              |
|    |                                                                                                              |                                                      |                                                                                              |
| 10 | Leadership or fiduciary role in other board, society, committee or advocacy group, paid or unpaid            | <input checked="" type="checkbox"/> None             |                                                                                              |
|    |                                                                                                              |                                                      |                                                                                              |
|    |                                                                                                              |                                                      |                                                                                              |
| 11 | Stock or stock options                                                                                       | <input type="checkbox"/> None<br>Gilead Sciences Inc | As an employee of Gilead Sciences, I have received and still own Restricted Stock Units      |
|    |                                                                                                              |                                                      |                                                                                              |
|    |                                                                                                              |                                                      |                                                                                              |
| 12 | Receipt of equipment, materials, drugs, medical writing, gifts or other services                             | <input checked="" type="checkbox"/> None             |                                                                                              |
|    |                                                                                                              |                                                      |                                                                                              |
|    |                                                                                                              |                                                      |                                                                                              |
| 13 | Other financial or non-financial interests                                                                   | <input checked="" type="checkbox"/> None             |                                                                                              |
|    |                                                                                                              |                                                      |                                                                                              |
|    |                                                                                                              |                                                      |                                                                                              |

Please place an "X" next to the following statement to indicate your agreement:

I certify that I have answered every question and have not altered the wording of any of the questions on this form.



## ICMJE DISCLOSURE FORM

Date: 11/30/2021

Your Name: Anuj Gaggar

Manuscript Title: **Targeted Long-Read Sequencing Reveals Clonally Expanded HBV-Associated Chromosomal Translocations in CHB Patients**

Manuscript number (if known): \_\_\_\_\_

In the interest of transparency, we ask you to disclose all relationships/activities/interests listed below that are related to the content of your manuscript. "Related" means any relation with for-profit or not-for-profit third parties whose interests may be affected by the content of the manuscript. Disclosure represents a commitment to transparency and does not necessarily indicate a bias. If you are in doubt about whether to list a relationship/activity/interest, it is preferable that you do so.

The following questions apply to the author's relationships/activities/interests as they relate to the **current manuscript only**.

The author's relationships/activities/interests should be **defined broadly**. For example, if your manuscript pertains to the epidemiology of hypertension, you should declare all relationships with manufacturers of antihypertensive medication, even if that medication is not mentioned in the manuscript.

In item #1 below, report all support for the work reported in this manuscript without time limit. For all other items, the time frame for disclosure is the past 36 months.

|                                                           |                                                                                                                                                                                | Name all entities with whom you have this relationship or indicate none (add rows as needed) | Specifications/Comments (e.g., if payments were made to you or to your institution) |
|-----------------------------------------------------------|--------------------------------------------------------------------------------------------------------------------------------------------------------------------------------|----------------------------------------------------------------------------------------------|-------------------------------------------------------------------------------------|
| <b>Time frame: Since the initial planning of the work</b> |                                                                                                                                                                                |                                                                                              |                                                                                     |
| 1                                                         | All support for the present manuscript (e.g., funding, provision of study materials, medical writing, article processing charges, etc.)<br><b>No time limit for this item.</b> | <input type="checkbox"/> None                                                                |                                                                                     |
|                                                           |                                                                                                                                                                                | Gilead Sciences                                                                              |                                                                                     |
|                                                           |                                                                                                                                                                                |                                                                                              |                                                                                     |
|                                                           |                                                                                                                                                                                |                                                                                              |                                                                                     |
|                                                           |                                                                                                                                                                                |                                                                                              |                                                                                     |
|                                                           |                                                                                                                                                                                |                                                                                              |                                                                                     |
| <b>Time frame: past 36 months</b>                         |                                                                                                                                                                                |                                                                                              |                                                                                     |
| 2                                                         | Grants or contracts from any entity (if not indicated in item #1 above).                                                                                                       | <input checked="" type="checkbox"/> None                                                     |                                                                                     |
|                                                           |                                                                                                                                                                                |                                                                                              |                                                                                     |
| 3                                                         | Royalties or licenses                                                                                                                                                          | <input checked="" type="checkbox"/> None                                                     |                                                                                     |
|                                                           |                                                                                                                                                                                |                                                                                              |                                                                                     |
| 4                                                         | Consulting fees                                                                                                                                                                | <input checked="" type="checkbox"/> None                                                     |                                                                                     |

|    |                                                                                                              |                                                  |  |
|----|--------------------------------------------------------------------------------------------------------------|--------------------------------------------------|--|
|    |                                                                                                              |                                                  |  |
| 5  | Payment or honoraria for lectures, presentations, speakers bureaus, manuscript writing or educational events | <input checked="" type="checkbox"/> None         |  |
| 6  | Payment for expert testimony                                                                                 | <input checked="" type="checkbox"/> None         |  |
| 7  | Support for attending meetings and/or travel                                                                 | <input type="checkbox"/> None<br>Gilead Sciences |  |
| 8  | Patents planned, issued or pending                                                                           | <input checked="" type="checkbox"/> None         |  |
| 9  | Participation on a Data Safety Monitoring Board or Advisory Board                                            | <input type="checkbox"/> None<br>Gilead Sciences |  |
| 10 | Leadership or fiduciary role in other board, society, committee or advocacy group, paid or unpaid            | <input type="checkbox"/> None<br>HBV Forum       |  |
| 11 | Stock or stock options                                                                                       | <input type="checkbox"/> None<br>Gilead Sciences |  |
| 12 | Receipt of equipment, materials, drugs, medical writing, gifts or other services                             | <input checked="" type="checkbox"/> None         |  |
| 13 | Other financial or non-financial interests                                                                   | <input checked="" type="checkbox"/> None         |  |

Please place an "X" next to the following statement to indicate your agreement:

I certify that I have answered every question and have not altered the wording of any of the questions on this form.

## ICMJE DISCLOSURE FORM

Date: 11/30/2021

Your Name: Patrick Marcellin

Manuscript Title: : Targeted Long-Read Sequencing Reveals Clonally Expanded HBV-Associated Chromosomal Translocations in CHB Patients

In the interest of transparency, we ask you to disclose all relationships/activities/interests listed below that are related to the content of your manuscript. "Related" means any relation with for-profit or not-for-profit third parties whose interests may be affected by the content of the manuscript. Disclosure represents a commitment to transparency and does not necessarily indicate a bias. If you are in doubt about whether to list a relationship/activity/interest, it is preferable that you do so.

The following questions apply to the author's relationships/activities/interests as they relate to the current manuscript only.

The author's relationships/activities/interests should be defined broadly. For example, if your manuscript pertains to the epidemiology of hypertension, you should declare all relationships with manufacturers of antihypertensive medication, even if that medication is not mentioned in the manuscript.

In item #1 below, report all support for the work reported in this manuscript without time limit. For all other items, the time frame for disclosure is the past 36 months.

|                                                           |                                                                                                                                                                                | Name all entities with whom you have this relationship or indicate none (add rows as needed) | Specifications/Comments (e.g., if payments were made to you or to your institution) |
|-----------------------------------------------------------|--------------------------------------------------------------------------------------------------------------------------------------------------------------------------------|----------------------------------------------------------------------------------------------|-------------------------------------------------------------------------------------|
| <b>Time frame: Since the initial planning of the work</b> |                                                                                                                                                                                |                                                                                              |                                                                                     |
| 1                                                         | All support for the present manuscript (e.g., funding, provision of study materials, medical writing, article processing charges, etc.)<br><b>No time limit for this item.</b> | <u>    </u> Gilead                                                                           | We helped collect the Biopsies at our site                                          |
|                                                           |                                                                                                                                                                                |                                                                                              |                                                                                     |
|                                                           |                                                                                                                                                                                |                                                                                              |                                                                                     |
|                                                           |                                                                                                                                                                                |                                                                                              |                                                                                     |
|                                                           |                                                                                                                                                                                |                                                                                              |                                                                                     |
|                                                           |                                                                                                                                                                                |                                                                                              |                                                                                     |
| <b>Time frame: past 36 months</b>                         |                                                                                                                                                                                |                                                                                              |                                                                                     |
| 2                                                         | Grants or contracts from any entity (if not indicated in item #1 above).                                                                                                       | <u>    </u> None                                                                             |                                                                                     |
|                                                           |                                                                                                                                                                                |                                                                                              |                                                                                     |
| 3                                                         | Royalties or licenses                                                                                                                                                          | <u>    </u> None                                                                             |                                                                                     |
|                                                           |                                                                                                                                                                                |                                                                                              |                                                                                     |
| 4                                                         | Consulting fees                                                                                                                                                                | <u>    </u> None                                                                             |                                                                                     |
|                                                           |                                                                                                                                                                                |                                                                                              |                                                                                     |
|                                                           |                                                                                                                                                                                |                                                                                              |                                                                                     |

|    |                                                                                                              |          |  |
|----|--------------------------------------------------------------------------------------------------------------|----------|--|
| 5  | Payment or honoraria for lectures, presentations, speakers bureaus, manuscript writing or educational events | ___ None |  |
|    |                                                                                                              |          |  |
|    |                                                                                                              |          |  |
| 6  | Payment for expert testimony                                                                                 | ___ None |  |
|    |                                                                                                              |          |  |
|    |                                                                                                              |          |  |
| 7  | Support for attending meetings and/or travel                                                                 | ___ None |  |
|    |                                                                                                              |          |  |
|    |                                                                                                              |          |  |
| 8  | Patents planned, issued or pending                                                                           | ___ None |  |
|    |                                                                                                              |          |  |
|    |                                                                                                              |          |  |
| 9  | Participation on a Data Safety Monitoring Board or Advisory Board                                            | ___ None |  |
|    |                                                                                                              |          |  |
|    |                                                                                                              |          |  |
| 10 | Leadership or fiduciary role in other board, society, committee or advocacy group, paid or unpaid            | ___ None |  |
|    |                                                                                                              |          |  |
|    |                                                                                                              |          |  |
| 11 | Stock or stock options                                                                                       | ___ None |  |
|    |                                                                                                              |          |  |
|    |                                                                                                              |          |  |
| 12 | Receipt of equipment, materials, drugs, medical writing, gifts or other services                             | ___ None |  |
|    |                                                                                                              |          |  |
|    |                                                                                                              |          |  |
| 13 | Other financial or non-financial interests                                                                   | ___ None |  |
|    |                                                                                                              |          |  |
|    |                                                                                                              |          |  |

Please place an "X" next to the following statement to indicate your agreement:

  X   I certify that I have answered every question and have not altered the wording of any of the questions on this form.
